# Supplementary material
Source: PubMed Central journal article supplement (PMC7026750)
Supplement: DS180082SupplementaryData.pdf [file DS180082SupplementaryData.pdf]

# Secular Trends in Information Communications Technology: Access, Use, and Attitudes of Young and Older Patients With Diabetes

Timothy L. Middleton<sup>1,2</sup> Maria I. Constantino,<sup>1,2</sup> Lynda Molyneaux,<sup>1,2</sup> Turki AlMogbel,<sup>1,3</sup> Margaret McGill,<sup>1,2</sup> Dennis K. Yue,<sup>1,2</sup> Stephen M. Twigg,<sup>1,2</sup> Ted Wu,<sup>1</sup> and Jencia Wong<sup>1,2</sup>

<https://doi.org/10.2337/ds17-0082> Published 6 September 2019

## Supplementary Data

- Supplementary Tables
- Supplementary Figure

## SUPPLEMENTARY MATERIAL

### Supplementary Table S1

Self-reported technology related behaviours in 2012 and 2017, stratified by current age

| Behaviour                               | Year | Overall                         |         | Under 40 years                  |         | Over 40 years                   |         |
|-----------------------------------------|------|---------------------------------|---------|---------------------------------|---------|---------------------------------|---------|
|                                         |      | Proportion who report behaviour | p value | Proportion who report behaviour | p value | Proportion who report behaviour | p value |
| Health related internet searching       | 2012 | 0.50                            | <0.001  | 0.79                            | 0.001   | 0.43                            | 0.004   |
|                                         | 2017 | 0.74                            |         | 0.95                            |         | 0.58                            |         |
| Regular use of a BGL meter*             | 2012 | 0.81                            | 0.01    | 0.89                            | 0.60    | 0.79                            | 0.08    |
|                                         | 2017 | 0.89                            |         | 0.93                            |         | 0.87                            |         |
| Download and print data from BGL meter† | 2012 | 0.14                            | 0.002   | 0.37                            | 0.06    | 0.09                            | <0.001  |
|                                         | 2017 | 0.25                            |         | 0.22                            |         | 0.28                            |         |

\* Regular use of a blood glucose meter was defined as use which occurred at least once a day. In the 2012 survey 266 respondents indicated that they owned a BGL meter; 216 respondents (81%) reported testing their blood sugar at least once a day. In the 2017 survey 268 respondents indicated that they owned a BGL meter; 239 respondents (89%) reported testing their blood sugar at least once a day.

† In 2012, 264 owners of a BGL meter responded to Q20 of the survey (Have you ever connected a glucose meter to a computer to print out your blood sugar readings?). In 2012, 38 respondents (14%) answered in the affirmative to Q20. In 2017, 266 owners of a BGL meter responded to Q20 of the survey and 67 respondents (25%) answered in the affirmative.

**Supplementary Table S2**

**Comparative Demographics of Survey Respondents and Clinic Population (Jan-Apr 2012)**

|                         |                      | <b>Survey Respondents (n=300)</b> | <b>Clinic Population (n=1815)</b> |
|-------------------------|----------------------|-----------------------------------|-----------------------------------|
| <b>Gender</b>           | <b>Male</b>          | 174 (58.0)                        | 902 (49.7)                        |
|                         | <b>Female</b>        | 120 (40.0)                        | 913 (50.3)                        |
|                         | <b>Not disclosed</b> | 6 (2.0)                           | -                                 |
| <b>Current Age</b>      | <b>&lt;30</b>        | 22 (7.3)                          | 42 (2.3)                          |
|                         | <b>30 to &lt;40</b>  | 35 (11.7)                         | 237 (13.1)                        |
|                         | <b>40 to &lt;50</b>  | 33 (11.0)                         | 261 (14.4)                        |
|                         | <b>50 to &lt;60</b>  | 71 (23.7)                         | 205 (11.3)                        |
|                         | <b>60 to &lt;70</b>  | 83 (27.7)                         | 378 (20.8)                        |
|                         | <b>≥70</b>           | 49 (16.3)                         | 683 (37.6)                        |
|                         | <b>Not disclosed</b> | 7 (2.3)                           | -                                 |
| <b>Type of Diabetes</b> | <b>T1DM</b>          | 61 (20.3)                         | 290 (16.0)                        |
|                         | <b>T2DM</b>          | 189 (63.0)                        | 1207 (66.5)                       |
|                         | <b>GDM</b>           | 1 (0.3)                           | 270 (14.9)                        |
|                         | <b>Other</b>         | -                                 | 48 (2.6)                          |
|                         | <b>Don't know</b>    | 34 (11.3)                         | -                                 |
|                         | <b>Not disclosed</b> | 15 (5.0)                          | -                                 |

Supplementary Table S3

Comparative Demographics of Survey Respondents and Clinic Population (Mar-Jun 2017)

|                  |               | Survey Respondents (n=314) | Clinic Population (n=1960) |
|------------------|---------------|----------------------------|----------------------------|
| Gender           | Male          | 129 (41.1)                 | 914 (46.6)                 |
|                  | Female        | 180 (57.3)                 | 1046 (53.4)                |
|                  | Not disclosed | 5 (1.6)                    | -                          |
| Current Age      | <30           | 35 (11.1)                  | 126 (6.4)                  |
|                  | 30 to <40     | 94 (29.9)                  | 413 (21.1)                 |
|                  | 40 to <50     | 42 (13.4)                  | 239 (12.2)                 |
|                  | 50 to <60     | 44 (14.0)                  | 278 (14.2)                 |
|                  | 60 to <70     | 57 (18.2)                  | 412 (21.0)                 |
|                  | ≥70           | 36 (11.5)                  | 492 (25.1)                 |
|                  | Not disclosed | 6 (1.9)                    | -                          |
| Type of Diabetes | T1DM          | 62 (19.7)                  | 325 (16.6)                 |
|                  | T2DM          | 148 (47.1)                 | 1169 (59.6)                |
|                  | GDM           | 79 (25.2)                  | 394 (20.1)                 |
|                  | Other         | -                          | 72 (3.7)                   |
|                  | Don't know    | 20 (6.4)                   | -                          |
|                  | Not disclosed | 5 (1.6)                    | -                          |

Supplementary Table S4a:

Self-reported access to technology in 2012 and 2017, stratified by gender

| Technology      | Year | Male                   | Female                 | p value |
|-----------------|------|------------------------|------------------------|---------|
|                 |      | Proportion with access | Proportion with access |         |
| Computer        | 2012 | 0.77                   | 0.67                   | 0.09    |
|                 | 2017 | 0.75                   | 0.76                   | 0.96    |
| Tablet          | 2012 | 0.18                   | 0.11                   | 0.17    |
|                 | 2017 | 0.50                   | 0.58                   | 0.21    |
| Mobile phone    | 2012 | 0.84                   | 0.82                   | 0.77    |
|                 | 2017 | 0.85                   | 0.89                   | 0.26    |
| Internet access | 2012 | 0.78                   | 0.67                   | 0.05    |
|                 | 2017 | 0.87                   | 0.90                   | 0.40    |
| No technology   | 2012 | 0.11                   | 0.10                   | 0.95    |
|                 | 2017 | 0.03                   | 0.03                   | 1       |

Supplementary Table S4b:

Mobile phone feature utilization in 2012 and 2017, stratified by gender

| Feature         | Year | Male                         | Female                       | p value |
|-----------------|------|------------------------------|------------------------------|---------|
|                 |      | Proportion utilizing feature | Proportion utilizing feature |         |
| Phone calls     | 2012 | 0.86                         | 0.81                         | 0.42    |
|                 | 2017 | 0.92                         | 0.88                         | 0.37    |
| SMS             | 2012 | 0.60                         | 0.56                         | 0.54    |
|                 | 2017 | 0.85                         | 0.84                         | 1       |
| Mobile internet | 2012 | 0.30                         | 0.31                         | 1       |
|                 | 2017 | 0.63                         | 0.72                         | 0.11    |
| Other apps      | 2012 | 0.27                         | 0.30                         | 0.65    |
|                 | 2017 | 0.42                         | 0.48                         | 0.41    |

**Supplementary Table S4c:**

**Patient comfort with technology and technology-based support stratified by gender**

| Technology / Tech-based support    | Year | Male                                               | Female                                             | p value |
|------------------------------------|------|----------------------------------------------------|----------------------------------------------------|---------|
|                                    |      | Proportion who are comfortable or very comfortable | Proportion who are comfortable or very comfortable |         |
| Technology in general              | 2012 | 0.62                                               | 0.52                                               | 0.13    |
|                                    | 2017 | 0.77                                               | 0.78                                               | 0.78    |
| Technology in diabetes             | 2012 | 0.64                                               | 0.54                                               | 0.13    |
|                                    | 2017 | 0.73                                               | 0.76                                               | 0.61    |
| Email contact from Diabetes Centre | 2012 | 0.67                                               | 0.56                                               | 0.08    |
|                                    | 2017 | 0.62                                               | 0.78                                               | 0.005   |
| Web-based diabetes consultation    | 2012 | 0.32                                               | 0.29                                               | 0.62    |
|                                    | 2017 | 0.34                                               | 0.45                                               | 0.08    |
| Online diabetes support group      | 2012 | 0.24                                               | 0.20                                               | 0.48    |
|                                    | 2017 | 0.30                                               | 0.34                                               | 0.47    |

Supplementary Table S5a:

Self-reported access to technology in 2012 and 2017, stratified by diabetes type

| Technology      | Year    | Type 1                 | Type 2                 | p value |
|-----------------|---------|------------------------|------------------------|---------|
|                 |         | Proportion with access | Proportion with access |         |
| Computer        | 2012    | 0.90                   | 0.70                   | 0.003   |
|                 | 2017    | 0.82                   | 0.70                   | 0.10    |
|                 | Overall | 0.86                   | 0.70                   | 0.001   |
| Tablet          | 2012    | 0.20                   | 0.14                   | 0.42    |
|                 | 2017    | 0.57                   | 0.46                   | 0.22    |
|                 | Overall | 0.38                   | 0.28                   | 0.06    |
| Mobile phone    | 2012    | 0.97                   | 0.80                   | 0.003   |
|                 | 2017    | 0.98                   | 0.81                   | 0.002   |
|                 | Overall | 0.98                   | 0.80                   | <0.001  |
| Internet access | 2012    | 0.90                   | 0.72                   | 0.006   |
|                 | 2017    | 0.90                   | 0.85                   | 0.45    |
|                 | Overall | 0.90                   | 0.78                   | 0.004   |
| No technology   | 2012    | 0.02                   | 0.12                   | 0.03    |
|                 | 2017    | 0                      | 0.07                   | 0.08    |
|                 | Overall | 0.01                   | 0.10                   | 0.002   |

Supplementary Table S5b:

Mobile phone feature utilization in 2012 and 2017, stratified by diabetes type

| Feature         | Year    | Type 1                       | Type 2                       | p value |
|-----------------|---------|------------------------------|------------------------------|---------|
|                 |         | Proportion utilizing feature | Proportion utilizing feature |         |
| Phone calls     | 2012    | 0.97                         | 0.80                         | 0.004   |
|                 | 2017    | 0.95                         | 0.94                         | 1       |
|                 | Overall | 0.96                         | 0.86                         | 0.006   |
| SMS             | 2012    | 0.89                         | 0.48                         | <0.001  |
|                 | 2017    | 0.92                         | 0.76                         | 0.02    |
|                 | Overall | 0.90                         | 0.60                         | <0.001  |
| Mobile internet | 2012    | 0.89                         | 0.48                         | <0.001  |
|                 | 2017    | 0.92                         | 0.76                         | 0.006   |
|                 | Overall | 0.66                         | 0.60                         | <0.001  |
| Other apps      | 2012    | 0.46                         | 0.22                         | 0.001   |
|                 | 2017    | 0.48                         | 0.43                         | 0.54    |
|                 | Overall | 0.47                         | 0.31                         | 0.002   |



Supplementary Table S5c:

Patient comfort with technology and technology-based support stratified by diabetes type

| Technology / Tech-based support    | Year    | Type 1                                             | Type 2                                             | p value |
|------------------------------------|---------|----------------------------------------------------|----------------------------------------------------|---------|
|                                    |         | Proportion who are comfortable or very comfortable | Proportion who are comfortable or very comfortable |         |
| Technology in general              | 2012    | 0.83                                               | 0.52                                               | <0.001  |
|                                    | 2017    | 0.71                                               | 0.70                                               | 0.98    |
|                                    | Overall | 0.77                                               | 0.60                                               | 0.001   |
| Technology in diabetes             | 2012    | 0.76                                               | 0.55                                               | 0.008   |
|                                    | 2017    | 0.70                                               | 0.66                                               | 0.71    |
|                                    | Overall | 0.73                                               | 0.60                                               | 0.02    |
| Email contact from Diabetes Centre | 2012    | 0.80                                               | 0.60                                               | 0.007   |
|                                    | 2017    | 0.69                                               | 0.62                                               | 0.38    |
|                                    | Overall | 0.75                                               | 0.61                                               | 0.009   |
| Web-based diabetes consultation    | 2012    | 0.46                                               | 0.28                                               | 0.01    |
|                                    | 2017    | 0.40                                               | 0.33                                               | 0.42    |
|                                    | Overall | 0.43                                               | 0.30                                               | 0.01    |
| Online diabetes support group      | 2012    | 0.25                                               | 0.22                                               | 0.71    |
|                                    | 2017    | 0.37                                               | 0.30                                               | 0.39    |
|                                    | Overall | 0.31                                               | 0.25                                               | 0.27    |

Supplementary Table S6a:

Comparison of self-reported access to technology in type 1 and type 2 diabetes, stratified by age group of respondent (<40 vs ≥40 years of age)

| Technology      | Year    | Type 1                 | Type 2                 | p value |
|-----------------|---------|------------------------|------------------------|---------|
|                 |         | Proportion with access | Proportion with access |         |
| Computer        | <40     | 0.91                   | 0.87                   | 0.84    |
|                 | ≥40     | 0.85                   | 0.69                   | 0.02    |
|                 | Overall | 0.88                   | 0.70                   | <0.001  |
| Tablet          | <40     | 0.38                   | 0.43                   | 0.80    |
|                 | ≥40     | 0.40                   | 0.27                   | 0.08    |
|                 | Overall | 0.39                   | 0.29                   | 0.05    |
| Mobile phone    | <40     | 0.98                   | 0.83                   | 0.02    |
|                 | ≥40     | 0.97                   | 0.80                   | 0.004   |
|                 | Overall | 0.98                   | 0.80                   | <0.001  |
| Internet access | <40     | 0.94                   | 0.97                   | 0.91    |
|                 | ≥40     | 0.90                   | 0.76                   | 0.04    |
|                 | Overall | 0.92                   | 0.78                   | 0.001   |
| No technology   | <40     | 0                      | 0                      | -       |
|                 | ≥40     | 0.02                   | 0.11                   | 0.06    |
|                 | Overall | 0.01                   | 0.10                   | 0.003   |

Supplementary Table S6b:

Comparison of mobile phone feature utilization in type 1 and type 2 diabetes, stratified by age group of respondent (<40 vs ≥40 years of age)

| Feature         | Year    | Type 1                       | Type 2                       | p value |
|-----------------|---------|------------------------------|------------------------------|---------|
|                 |         | Proportion utilizing feature | Proportion utilizing feature |         |
| Phone calls     | <40     | 0.97                         | 0.93                         | 0.79    |
|                 | ≥40     | 0.95                         | 0.85                         | 0.08    |
|                 | Overall | 0.96                         | 0.86                         | 0.006   |
| SMS             | <40     | 0.98                         | 0.86                         | 0.06    |
|                 | ≥40     | 0.85                         | 0.58                         | <0.001  |
|                 | Overall | 0.92                         | 0.60                         | <0.001  |
| Mobile internet | <40     | 0.83                         | 0.86                         | 0.89    |
|                 | ≥40     | 0.50                         | 0.34                         | 0.03    |
|                 | Overall | 0.67                         | 0.39                         | <0.001  |
| Other apps      | <40     | 0.64                         | 0.62                         | 1       |
|                 | ≥40     | 0.31                         | 0.28                         | 0.71    |
|                 | Overall | 0.48                         | 0.31                         | 0.001   |

Supplementary Table S6c:

Comparison of patient comfort levels in type 1 and type 2 diabetes, stratified by age group of respondent (<40 vs ≥40 years of age)

| Technology / Tech-based support    | Year    | Type 1                                             | Type 2                                             | p value |
|------------------------------------|---------|----------------------------------------------------|----------------------------------------------------|---------|
|                                    |         | Proportion who are comfortable or very comfortable | Proportion who are comfortable or very comfortable |         |
| Technology in general              | <40     | 0.86                                               | 0.90                                               | 0.79    |
|                                    | ≥40     | 0.70                                               | 0.57                                               | 0.08    |
|                                    | Overall | 0.78                                               | 0.60                                               | <0.001  |
| Technology in diabetes             | <40     | 0.82                                               | 0.80                                               | 1       |
|                                    | ≥40     | 0.65                                               | 0.58                                               | 0.37    |
|                                    | Overall | 0.74                                               | 0.60                                               | 0.009   |
| Email contact from Diabetes Centre | <40     | 0.79                                               | 0.77                                               | 0.98    |
|                                    | ≥40     | 0.72                                               | 0.60                                               | 0.11    |
|                                    | Overall | 0.76                                               | 0.61                                               | 0.005   |
| Web-based diabetes consultation    | <40     | 0.49                                               | 0.48                                               | 1       |
|                                    | ≥40     | 0.36                                               | 0.28                                               | 0.32    |
|                                    | Overall | 0.43                                               | 0.30                                               | 0.01    |
| Online diabetes support group      | <40     | 0.38                                               | 0.27                                               | 0.42    |
|                                    | ≥40     | 0.25                                               | 0.25                                               | 1       |
|                                    | Overall | 0.32                                               | 0.25                                               | 0.25    |

**Supplementary Table S7a:**

**Self-reported access to technology in 2017  
(GDM vs non-GDM respondents aged <40 years)**

| <b>Technology</b>      | <b>GDM (n=75)<br/>Proportion with access</b> | <b>Non-GDM (n=54)<br/>Proportion with access</b> | <b>p value</b> |
|------------------------|----------------------------------------------|--------------------------------------------------|----------------|
| <b>Computer</b>        | 0.84                                         | 0.85                                             | 0.85           |
| <b>Tablet</b>          | 0.79                                         | 0.56                                             | 0.005          |
| <b>Mobile</b>          | 0.91                                         | 0.91                                             | 0.99           |
| <b>Internet access</b> | 0.96                                         | 0.96                                             | 0.95           |
| <b>No technology</b>   | 0                                            | 0                                                | -              |

**Supplementary Table S7b:**

**Mobile phone feature utilization in 2017  
(GDM vs non-GDM respondents aged <40 years)**

| <b>Feature</b>         | <b>GDM (n=75)<br/>Proportion who utilize<br/>feature</b> | <b>Non-GDM (n=54)<br/>Proportion who utilize<br/>feature</b> | <b>p value</b> |
|------------------------|----------------------------------------------------------|--------------------------------------------------------------|----------------|
| <b>Phone calls</b>     | 0.84                                                     | 0.90                                                         | 0.30           |
| <b>SMS</b>             | 0.93                                                     | 0.85                                                         | 0.11           |
| <b>Mobile internet</b> | 0.87                                                     | 0.89                                                         | 0.76           |
| <b>Other apps</b>      | 0.53                                                     | 0.56                                                         | 0.79           |

**Supplementary Table S7c:**

**Patient comfort with technology and technology-based support in 2017  
(GDM vs non-GDM respondents aged <40 years)**

| <b>Technology /<br/>Tech-based support</b>    | <b>GDM (n=75)<br/>Proportion reporting<br/>comfort</b> | <b>Non-GDM (n=54)<br/>Proportion reporting<br/>comfort</b> | <b>p value</b> |
|-----------------------------------------------|--------------------------------------------------------|------------------------------------------------------------|----------------|
| <b>Technology in<br/>General</b>              | 0.96                                                   | 0.85                                                       | 0.06           |
| <b>Technology in<br/>diabetes</b>             | 0.92                                                   | 0.79                                                       | 0.04           |
| <b>Email contact from<br/>Diabetes Centre</b> | 0.91                                                   | 0.74                                                       | 0.01           |
| <b>Web-based diabetes<br/>Consultation</b>    | 0.53                                                   | 0.44                                                       | 0.35           |
| <b>Online diabetes<br/>support group</b>      | 0.35                                                   | 0.31                                                       | 0.66           |

**SUPPLEMENTARY MATERIAL**

**Supplementary Figure S1**

**Technology and Diabetes Survey**  
**Diabetes Centre**  
**Royal Prince Alfred Hospital**

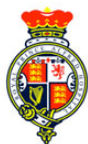

If you have already done this survey, please inform the staff.  
You only need to do it once!

**If you do not understand a question or you are not sure of an answer, please leave it blank.**

(1) What language do you mainly speak at home?

\_\_\_\_\_

(2) What is your gender?

- Male  Female

(3) In which age group do you belong?

- Under 20  50 to 59  
 20 to 29  60 to 69  
 30 to 39  70+  
 40 to 49

(4) What is the postcode of your home address?

\_\_\_\_\_

(5) Which of the following devices do you have access to at home? (Tick more than one if necessary)

- Computer (desktop or laptop)  
 Printer  
 Webcam  
 Tablet (iPad or similar)  
 Mobile phone  
 None of the above

(6) For those who own mobile phones, which features of your mobile phone do you make use of? (Tick more than one if necessary)

- Phone calls  
 SMS (Text messaging)  
 Mobile internet  
 Other applications (eg. games, calendars etc)

(7) What sort of internet connection do you have at home? (Tick more than one if necessary)

- Do not have one  
 Have one but don't know which type  
 Dial-up  
 Wireless USB stick / mobile internet  
 ADSL  
 Cable  
 Satellite  
 National Broadband Network fibre to the home

(8) Do you know what these symbols represent?

|                                                                                     |
|-------------------------------------------------------------------------------------|
|  |
| <input type="radio"/> Yes <input type="radio"/> No                                  |

|                                                                                     |
|-------------------------------------------------------------------------------------|
|  |
| <input type="radio"/> Yes <input type="radio"/> No                                  |

(9) Do you search for health information on the internet?  
 Yes  No

(10) Have you used the Diabetes Australia or ADC website?  
 Yes  No

(11) Which other diabetes websites do you use?

\_\_\_\_\_  
\_\_\_\_\_

(12) How comfortable are you with technology in general?

- Not at all comfortable  
 A little uncomfortable  
 Neither comfortable nor uncomfortable  
 Comfortable  
 Very comfortable

(13) How comfortable are you with increasing the use of technology in the care of your diabetes?

- Not at all comfortable  
 A little uncomfortable  
 Neither comfortable nor uncomfortable  
 Comfortable  
 Very comfortable

(14) Would you be comfortable with your Diabetes Centre contacting you about your diabetes care by email?

- Yes  No  Undecided

(15) Would you be comfortable with having a diabetes consultation over the internet (using a web camera) with your regular diabetes doctor?

- Yes  No  Undecided

(16) Would you be interested in joining an online diabetes support group?

- Yes  No  Undecided

(17) What type of diabetes do you have?

- Type 1  Type 2  
 Gestational  Don't know

(18) Do you take insulin?

- Yes  No

(19) On average, how many times per day do you test your blood sugars at home?

- I do not own a blood glucose meter  
 0  
 1-2  
 3-4  
 5 or more

(20) Have you ever connected a glucose meter to a computer to print out your blood sugar readings?

- Yes, at home  
 Yes, at the Diabetes Centre  
 No

*Thank you for completing this anonymous survey. Please hand your completed survey to one of the staff members.*
